# Supplementary material
Source: publisher figshare collection journal article supplement (https://gsajournals.figshare.com/articles/dataset/_/11959209)
Supplement: Supplementary file 1 [file 1]

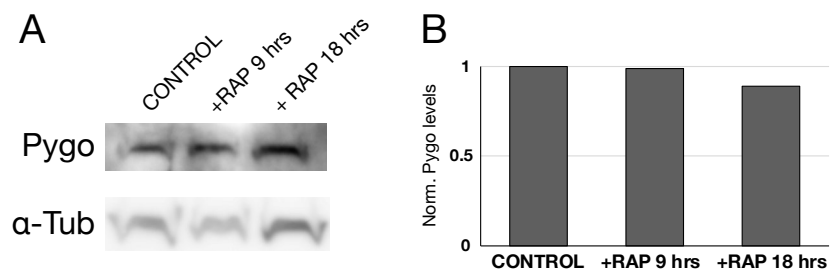

**Figure S1. Pygo anchoring does not increase protein degradation.**

A) Western Blot to detect endogenous GFP::*Pygo*. Protein levels were measured before rapamycin treatment as control and after feeding the larvae with rapamycin for 9 or 18 hrs. *Pygo* protein amount, normalized to  $\alpha$ -Tub levels. *Pygo* levels did not notably drop after rapamycin treatment.
