# Supplementary material
Source: publisher figshare collection journal article supplement (https://gsajournals.figshare.com/articles/dataset/_/11959209)
Supplement: Supplementary file 2 [file 1]

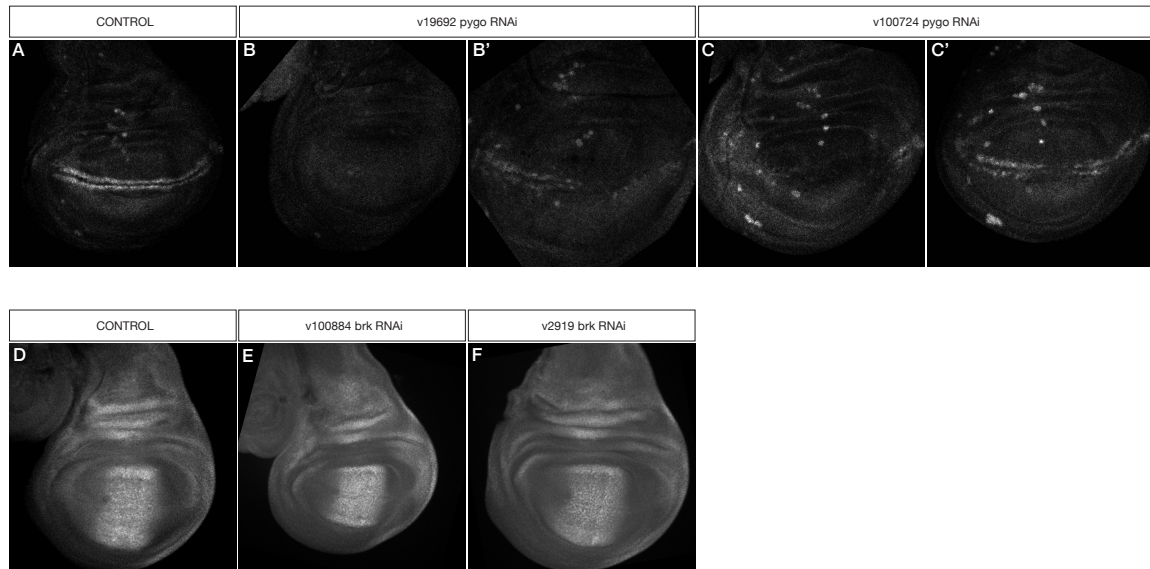

**Figure S2. Testing different *pygo* and *brk* RNAi lines.**

A) Control discs without RNAi expression. B-C') Wing discs expressing RNAi against *pygo* driven by C765-Gal4. The two RNAi lines, v19692 (B, B') and v100724 (C, C') downregulated *pygo* to a level that resulted in a complete loss of Sens (B, C). A few discs, however (B', C') showed detectable Sens. D-F) Two *brk* RNAi lines were tested, driven by C765-Gal4. Neither of the two caused any detectable loss of *brk*, as it did not alter the protein levels of its downstream target *salmon*.
